# Supplementary material for: New approach for the synthesis of water soluble fac-[MI(CO)3]+ bis(diarylphosphino)alkylamine complexes (M = 99Tc, Re)
Source: Royal Society of Chemistry journal article supplement (doi:10.1039/d1dt03234h), 2021-01-01
Supplement: d1dt03234h1.pdf [file d1dt03234h1.pdf]

**New approach for the synthesis of water soluble of *fac*-{M<sup>I</sup>(CO)<sub>3</sub>}<sup>+</sup>  
bis(diarylphosphino)alkylamine complexes (M=<sup>99</sup>Tc, Re)**

*Dumisani V. Kama,<sup>a</sup> Angelo Frei,<sup>b</sup> Alice Brink,<sup>a</sup> Henrik Braband,<sup>b</sup> Roger  
Alberto<sup>b,\*</sup> and Andreas Roodt<sup>a,\*</sup>*

<sup>a</sup>Department of Chemistry, University of the Free State, PO Box 339, Bloemfontein 9300, South  
Africa;

<sup>b</sup>Department of Chemistry, University of Zürich, Winterthurerstrasse 190, 8057 Zürich,  
Switzerland.

## Table of Contents

|      |                                                                                                       |     |
|------|-------------------------------------------------------------------------------------------------------|-----|
| 1.   | NMR/IR Data for 1A .....                                                                              | 2   |
| 1.1. | <sup>1</sup> H NMR spectrum for <i>fac</i> -[Re(NBoc-PNP)(CO) <sub>3</sub> Br] (1A) .....             | 2   |
| 1.2. | <sup>31</sup> P NMR spectrum for <i>fac</i> -[Re(NBoc-PNP)(CO) <sub>3</sub> Br] (1A).....             | 3   |
| 1.3. | IR spectrum for <i>fac</i> -[Re(NBoc-PNP)(CO) <sub>3</sub> Br] (1A) .....                             | 4   |
| 2.   | NMR/IR Data for 1B .....                                                                              | 5   |
| 2.1. | <sup>1</sup> H NMR spectrum of <i>fac</i> -[Re(NH <sub>3</sub> -PNP)(CO) <sub>3</sub> Br] (1B) .....  | 5   |
| 2.2. | <sup>31</sup> P NMR spectrum of <i>fac</i> -[Re(NH <sub>3</sub> -PNP)(CO) <sub>3</sub> Br] (1B) ..... | 6   |
| 2.3. | IR spectrum for <i>fac</i> -[Re(NH <sub>3</sub> -PNP)(CO) <sub>3</sub> Br] (1B).....                  | 7   |
| 3.   | NMR/IR data for 1C .....                                                                              | 8   |
| 3.1  | <sup>1</sup> H NMR spectrum for <i>fac</i> -[Re(NH <sub>2</sub> -PNP)(CO) <sub>3</sub> Br] (1C).....  | 8   |
| 3.2  | <sup>31</sup> P NMR spectrum for <i>fac</i> -[Re(NH <sub>2</sub> -PNP)(CO) <sub>3</sub> Br] (1C)..... | 9   |
| 3.3  | IR spectrum for <i>fac</i> -[Re(NH <sub>2</sub> -PNP)(CO) <sub>3</sub> Br] (1C).....                  | 10  |
|      | IR overlay of 1A (Red), 1B (Green) and 1C (Blue).....                                                 | 11  |
| 4.   | NMR/IR data for 1D .....                                                                              | 12  |
| 4.1  | <sup>1</sup> H NMR spectrum for <i>fac</i> -[Re(NH <sub>2</sub> -PNP)(CO) <sub>3</sub> Br] (1C).....  | 12  |
| 4.2  | <sup>31</sup> P NMR spectrum for <i>fac</i> -[Re(NH <sub>2</sub> -PNP)(CO) <sub>3</sub> Br] (1C)..... | 13  |
| 4.3  | <sup>1</sup> H NMR spectrum for <i>fac</i> -[Re(NH <sub>2</sub> -PNP)(CO) <sub>3</sub> Br] (1C).....  | 14  |
| 4.4  | IR spectrum for <i>fac</i> -[Re(NH <sub>2</sub> -PNP)(CO) <sub>3</sub> Br] (1C).....                  | 105 |
| 5.   | Preliminary substitution kinetic evaluation.....                                                      | 16  |
| 5.1. | 1,3,5-triaza-7-phosphaadamantane (PTA) as the entering ligand .....                                   | 16  |
|      | Figure S 1 Reaction scheme.....                                                                       | 16  |
|      | Figure S 2 Stacked plot .....                                                                         | 17  |
| 5.2. | Pyridine as the entering ligand.....                                                                  | 18  |
|      | Figure S 3 Reaction scheme.....                                                                       | 18  |
|      | Figure S 4 Stacked plot .....                                                                         | 19  |
| 5.3. | Thiocyanate anion (using NaSCN) as the entering ligand .....                                          | 20  |
|      | Figure S 5 Reaction scheme.....                                                                       | 20  |
|      | Figure S 6 Stacked plot .....                                                                         | 21  |

## 1. NMR/IR Data for 1A

### 1.1. $^1\text{H}$ NMR spectrum for *fac*-[Re(NBoc-PNP)(CO)<sub>3</sub>Br] (1A)

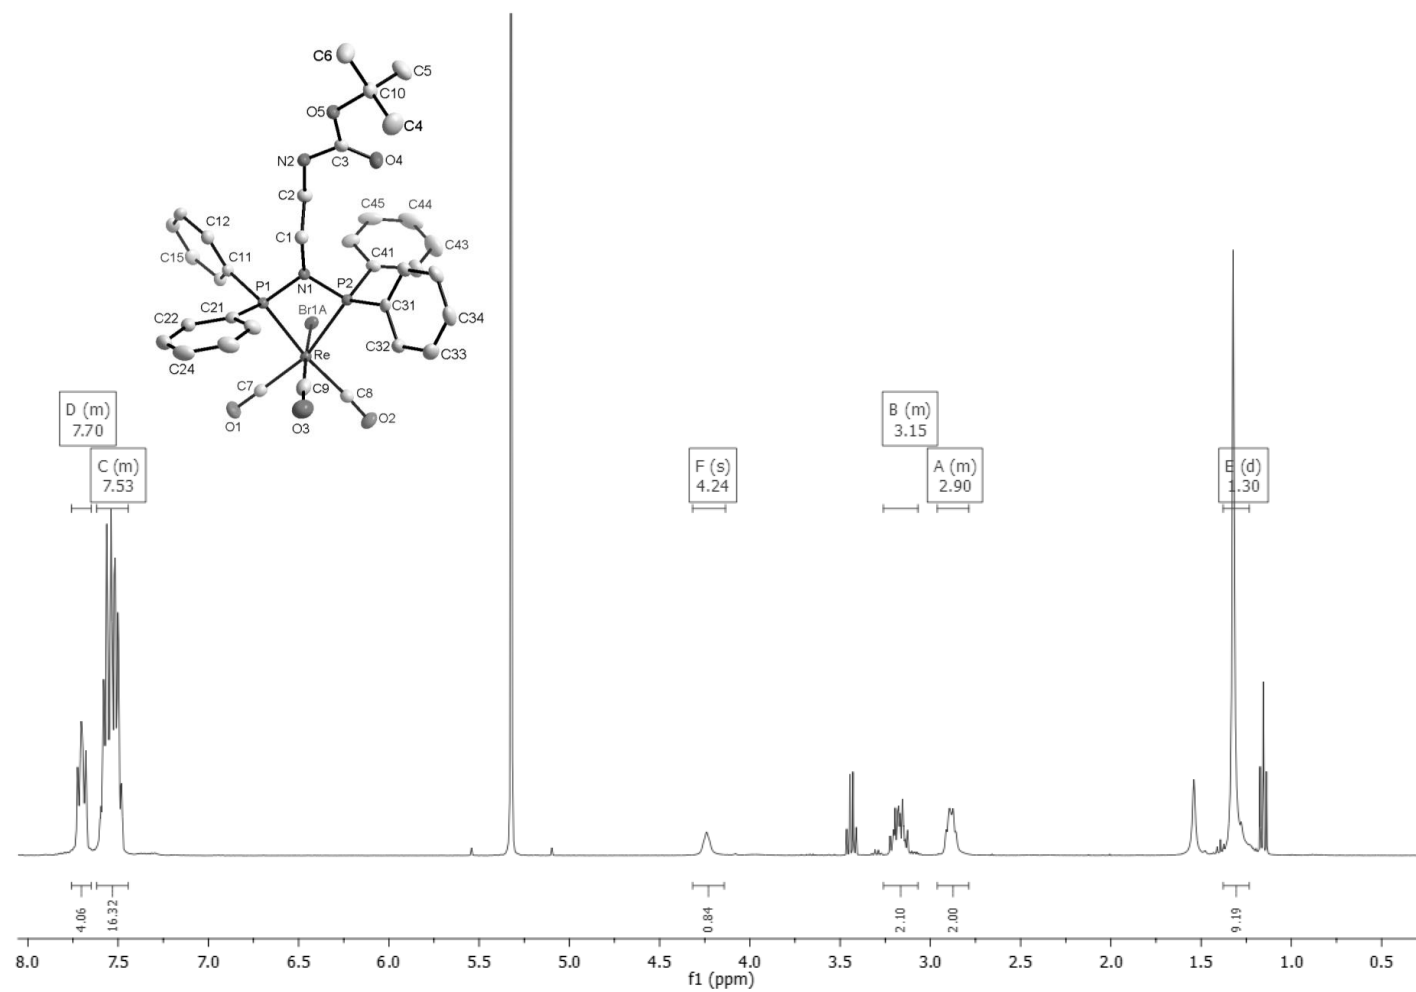

1.2.  $^{31}\text{P}$  NMR spectrum for *fac*-[Re(NBoc-PNP)(CO)<sub>3</sub>Br] (1A)

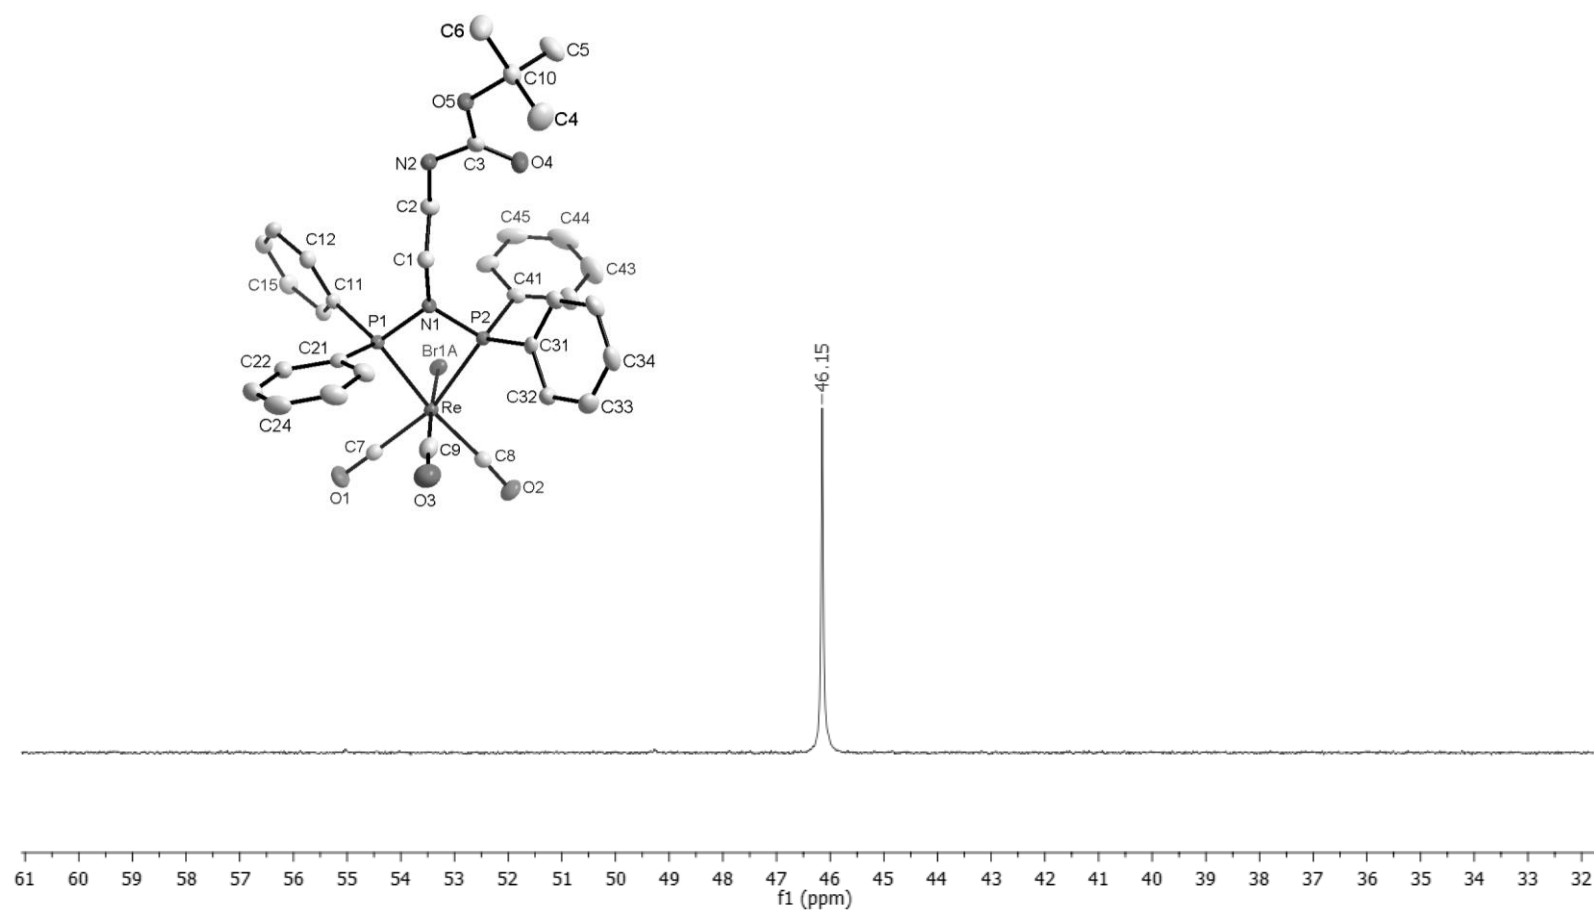

### 1.3. IR spectrum for *fac*-[Re(NBoc-PNP)(CO)<sub>3</sub>Br] (1A)

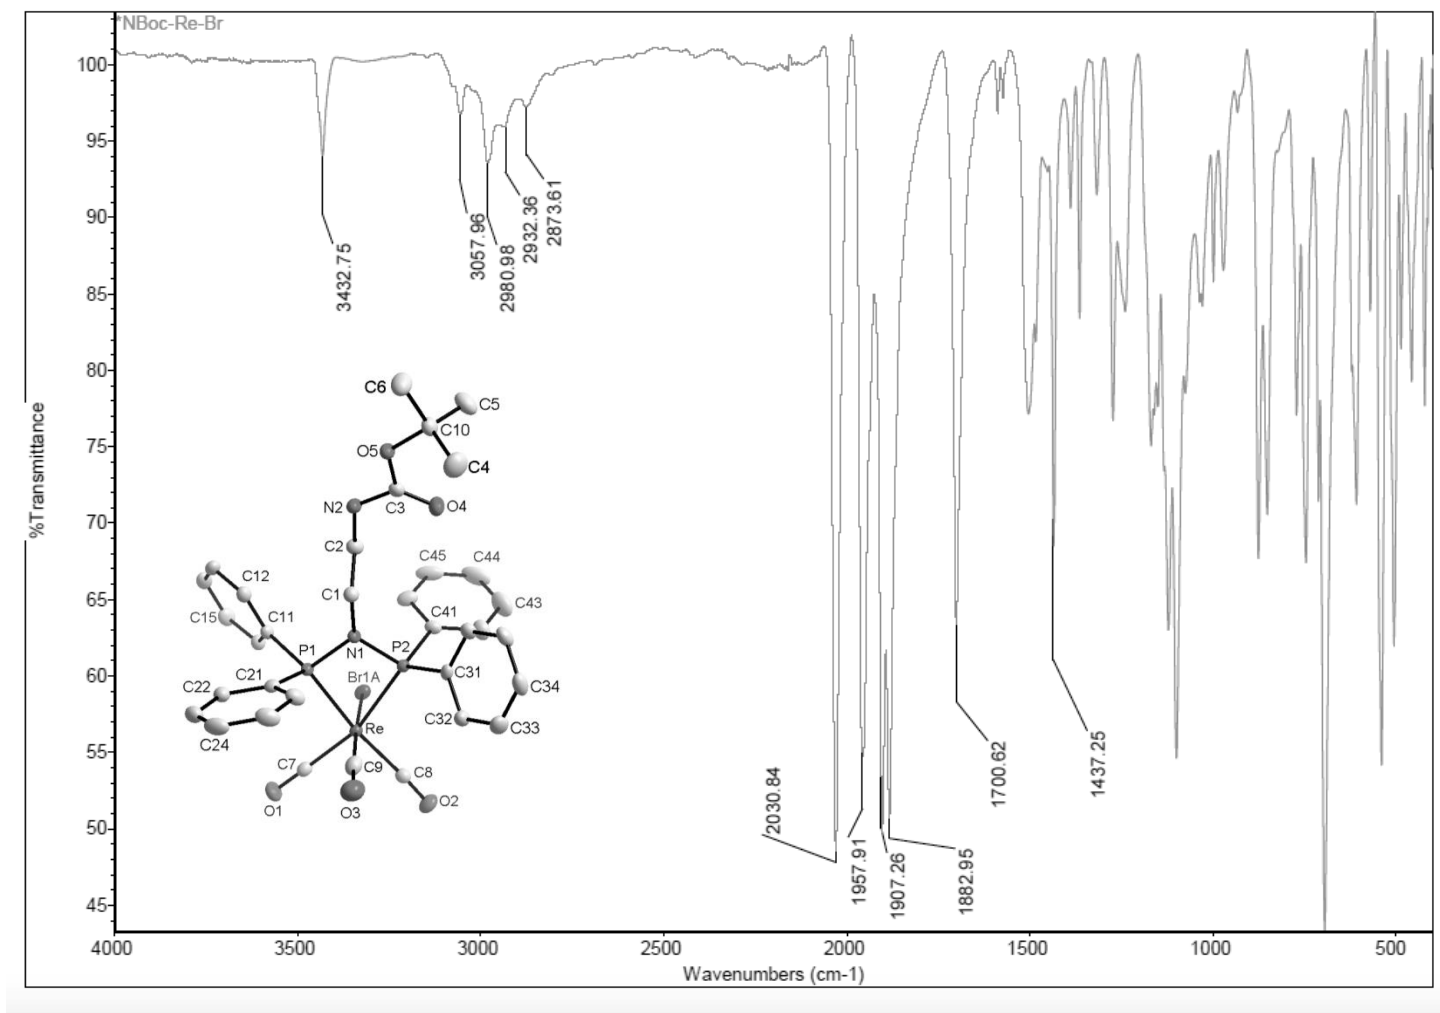



## 2.2. $^{31}\text{P}$ NMR spectrum of *fac*-[Re(NH<sub>3</sub>-PNP)(CO)<sub>3</sub>Br] (1B)

NMR2020  
NH3-Re-Br+TFA(100ul)+ std  
in CDCl3(650ul)overnight

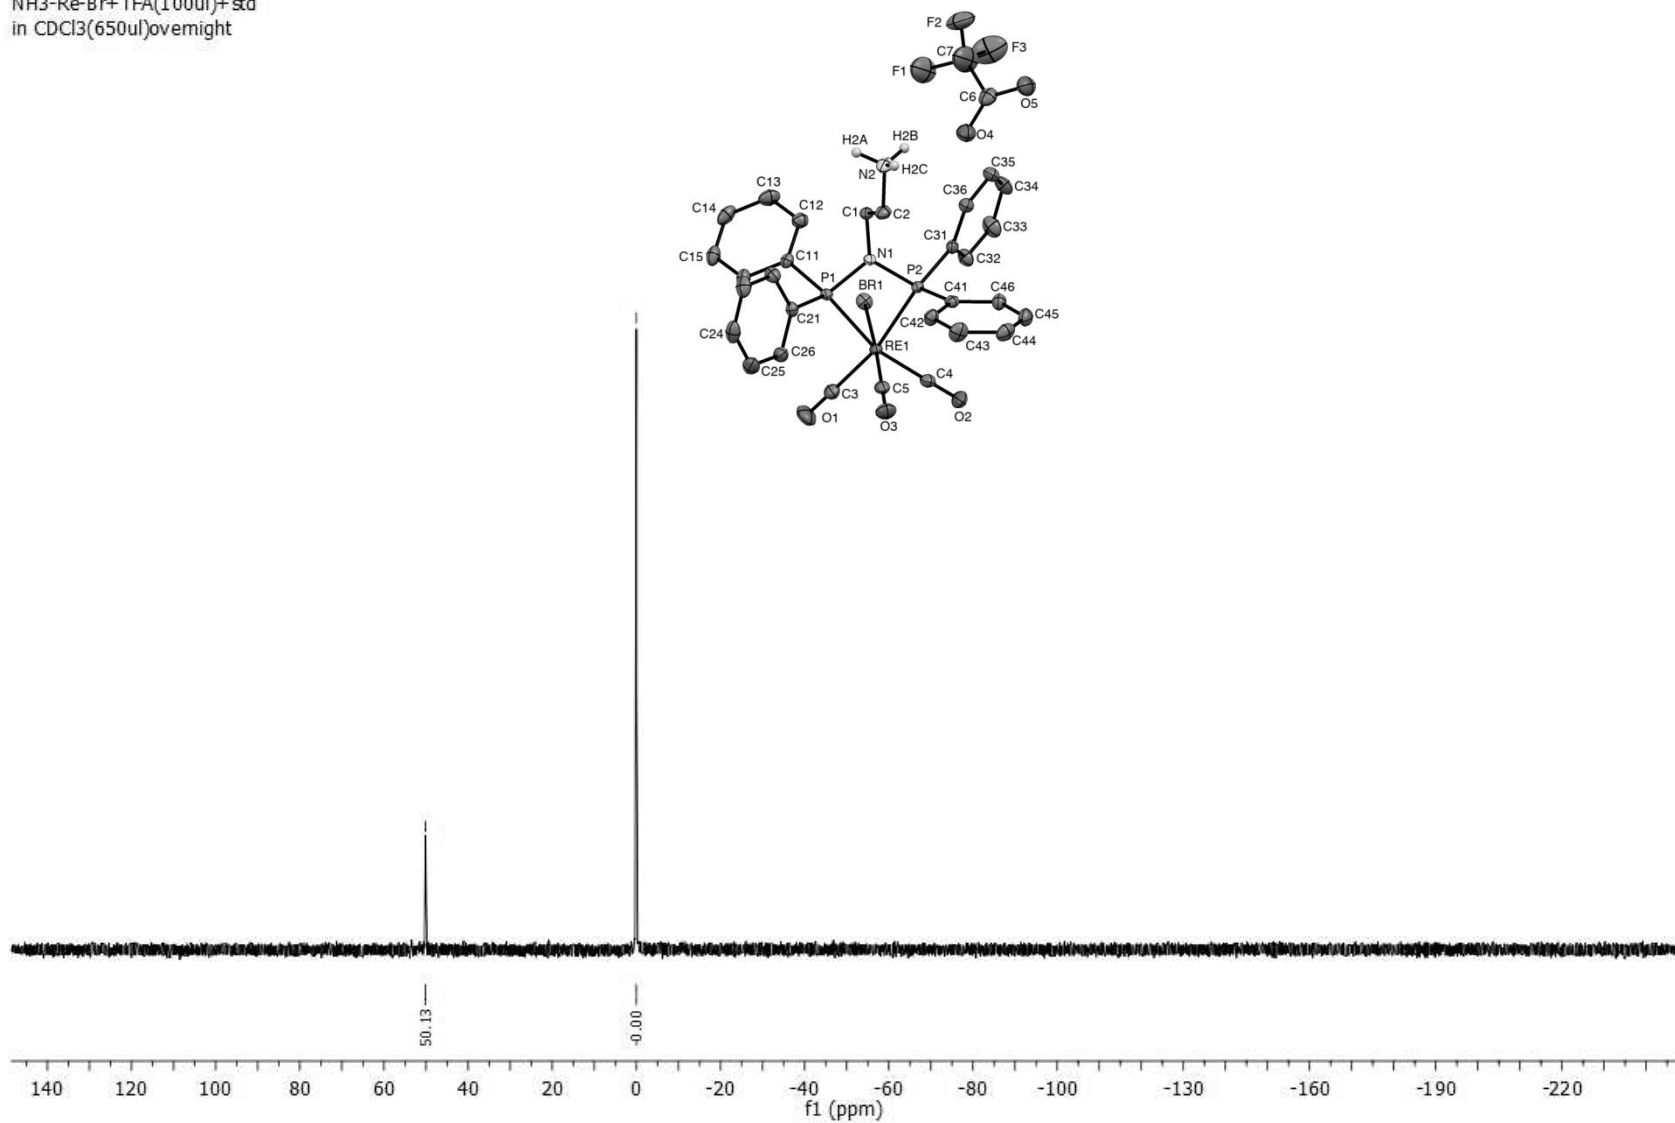

### 2.3. IR spectrum for *fac*-[Re(NH<sub>3</sub>-PNP)(CO)<sub>3</sub>Br] (1B)

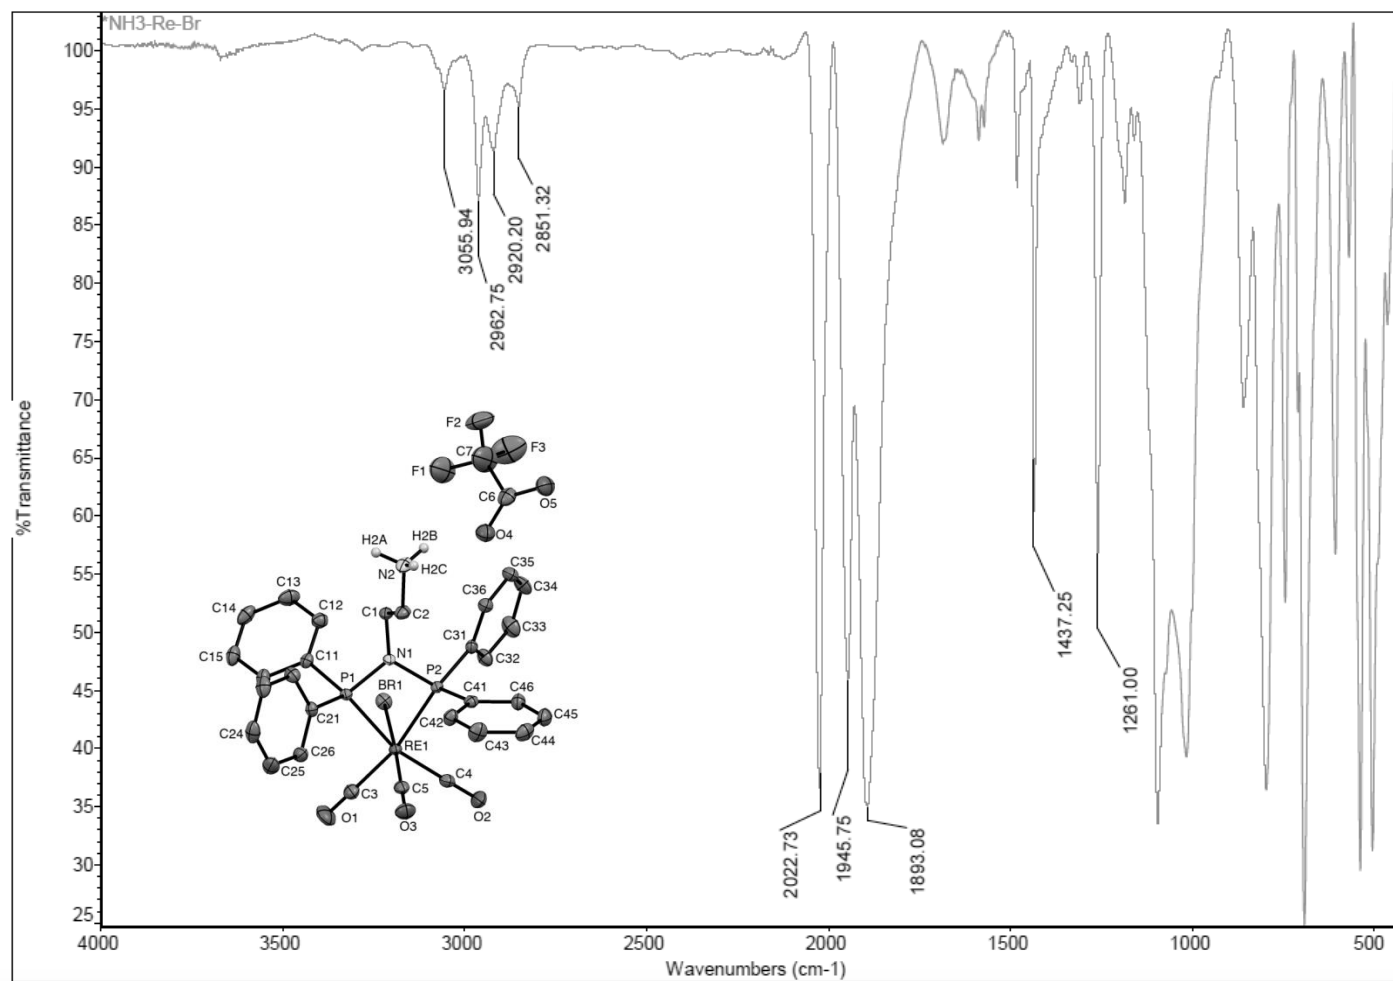



### 3. NMR/IR data for 1C

#### 3.1 $^1\text{H}$ NMR spectrum for *fac*-[Re(NH<sub>2</sub>-PNP)(CO)<sub>3</sub>Br] (1C)

NMR2020  
NH<sub>3</sub>-Re-Br+TFA  
in Acetonitrile

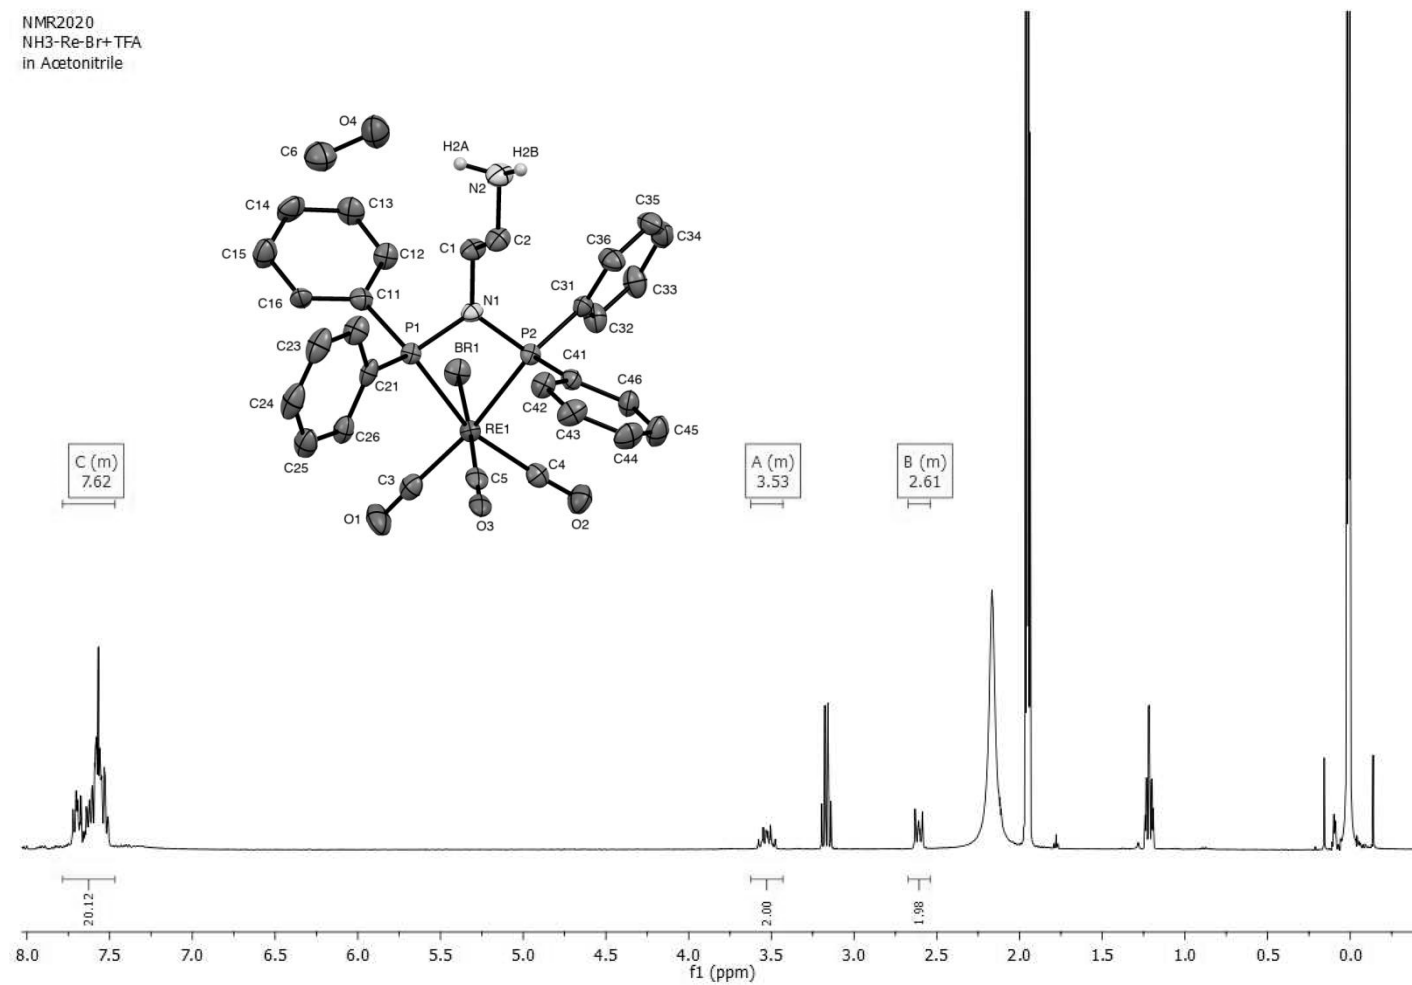

### 3.2 $^{31}\text{P}$ NMR spectrum for *fac*-[Re(NH<sub>2</sub>-PNP)(CO)<sub>3</sub>Br] (1C)

NMR2020  
NH2-Re-Br+std  
in CDCl<sub>3</sub>(650ul)overnight

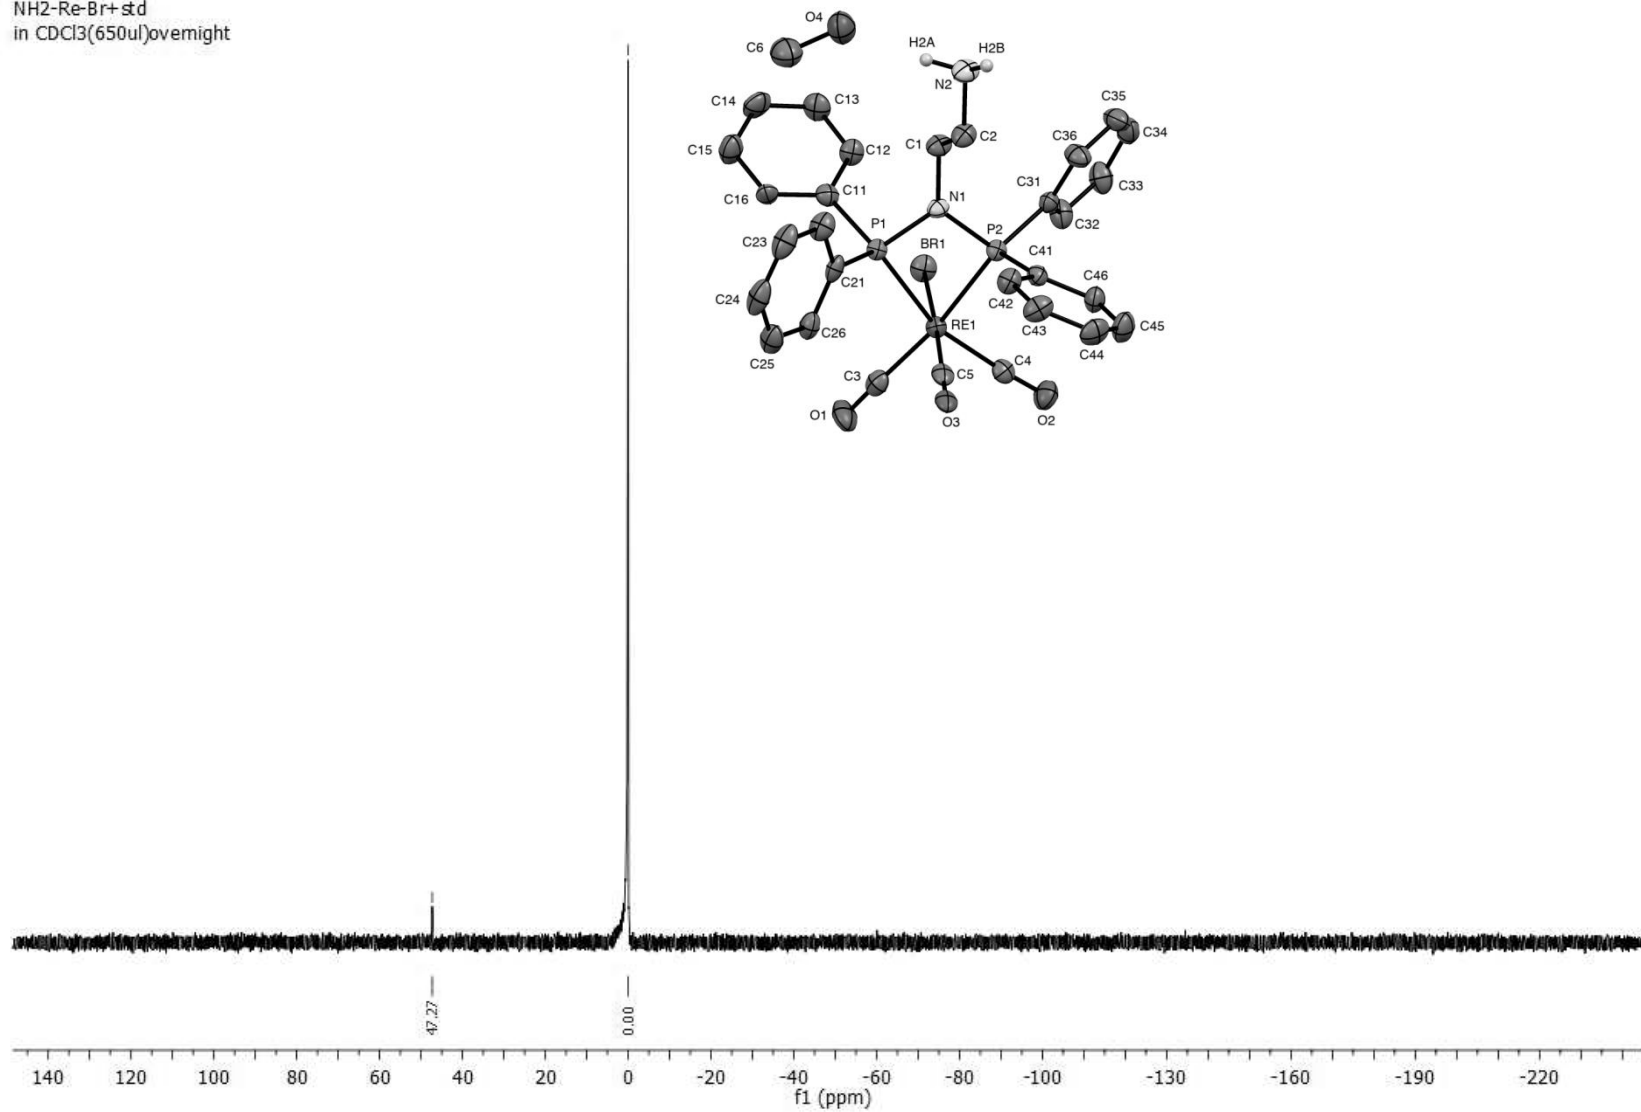

### 3.3 IR spectrum for *fac*-[Re(NH<sub>2</sub>-PNP)(CO)<sub>3</sub>Br] (1C)

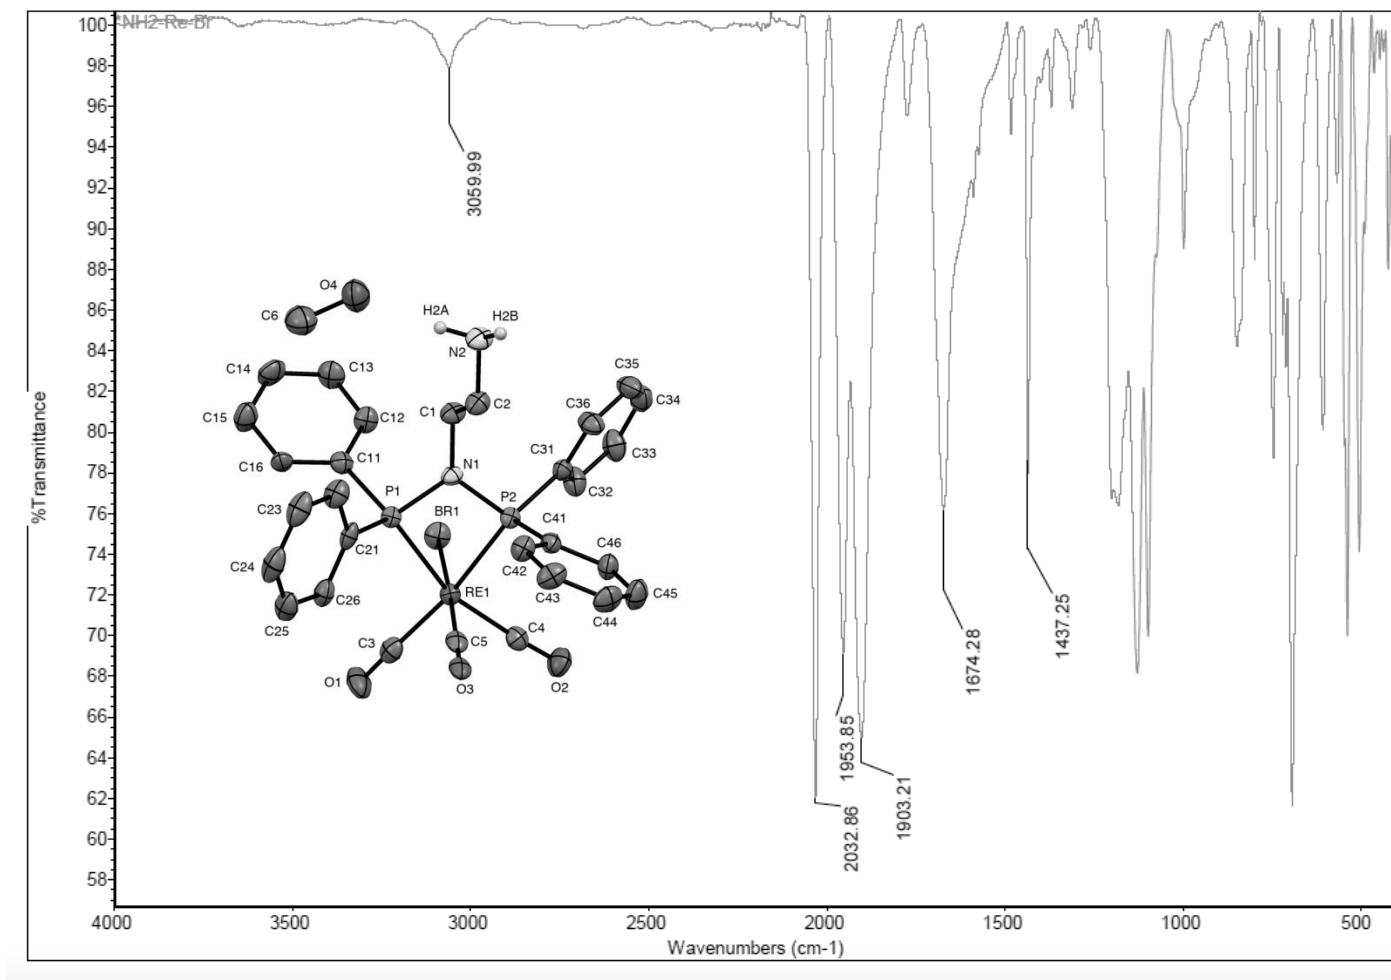

# IR overlay of 1A (Red), 1B (Green) and 1C (Blue)

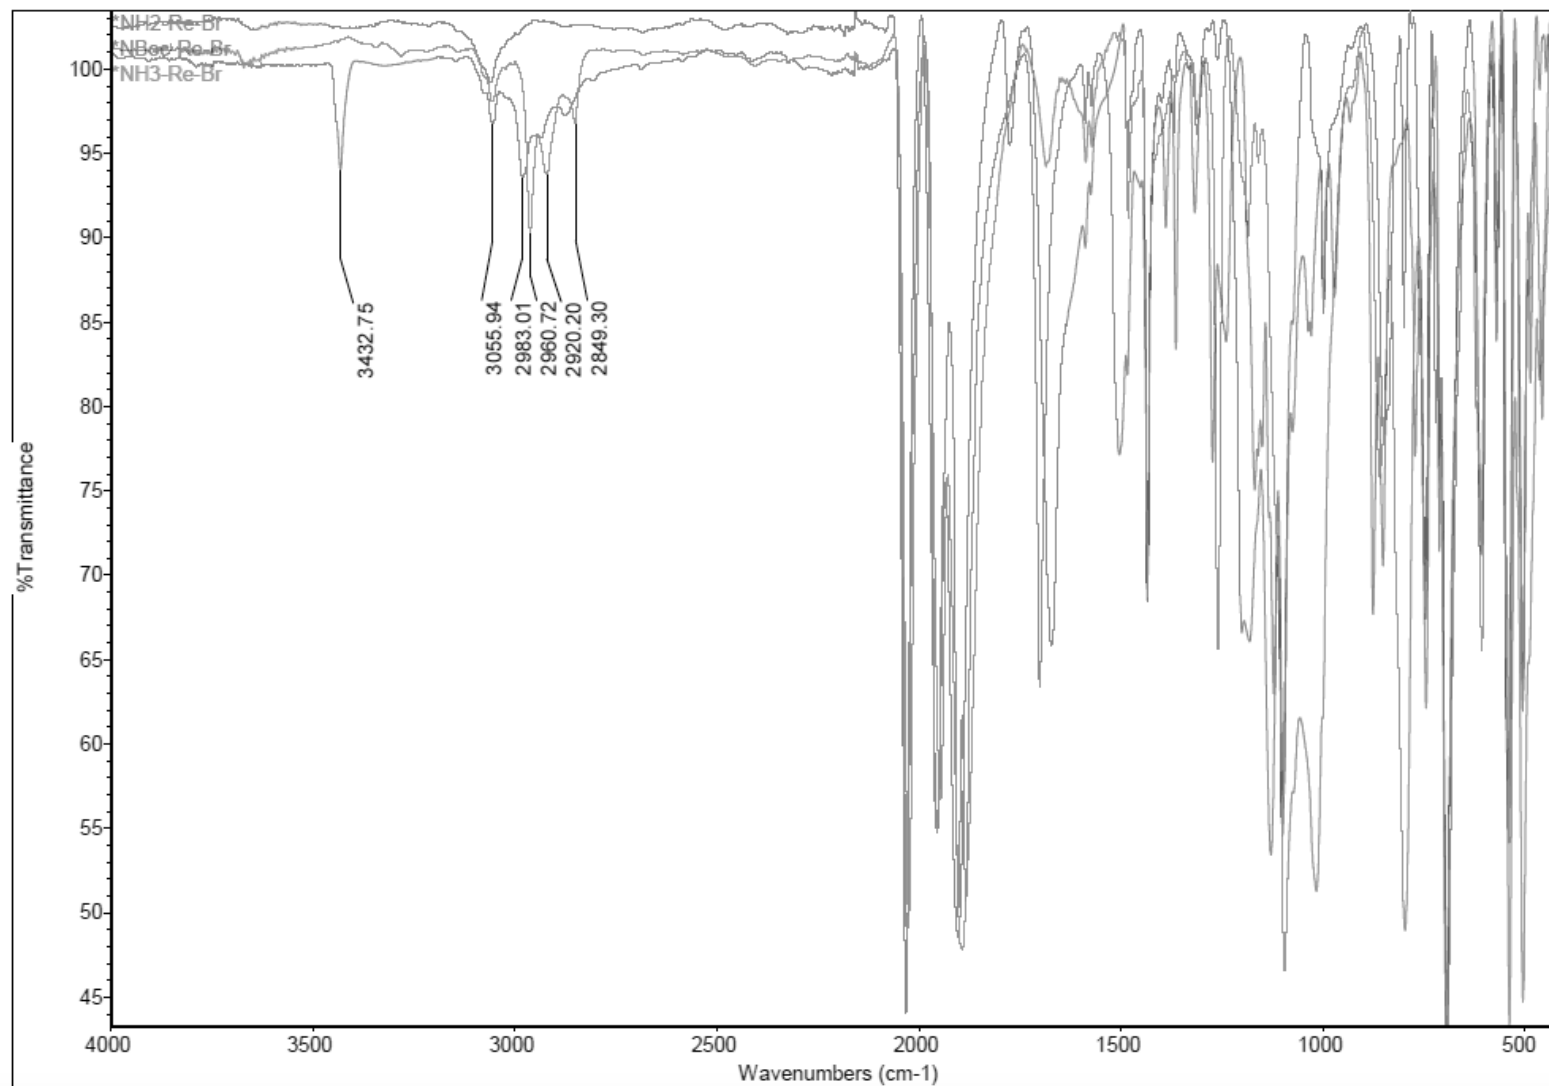

## 4. NMR/IR data for 1C

### 4.1 H-1 NMR *fac*-[<sup>99</sup>Tc(NBoc-PNP)(CO)<sub>3</sub>Cl] (1D)

<sup>1</sup>H-NMR: A\_Henrik\_081021 1/1 [Tc] in cd<sub>2</sub>cl<sub>2</sub>, 293 K

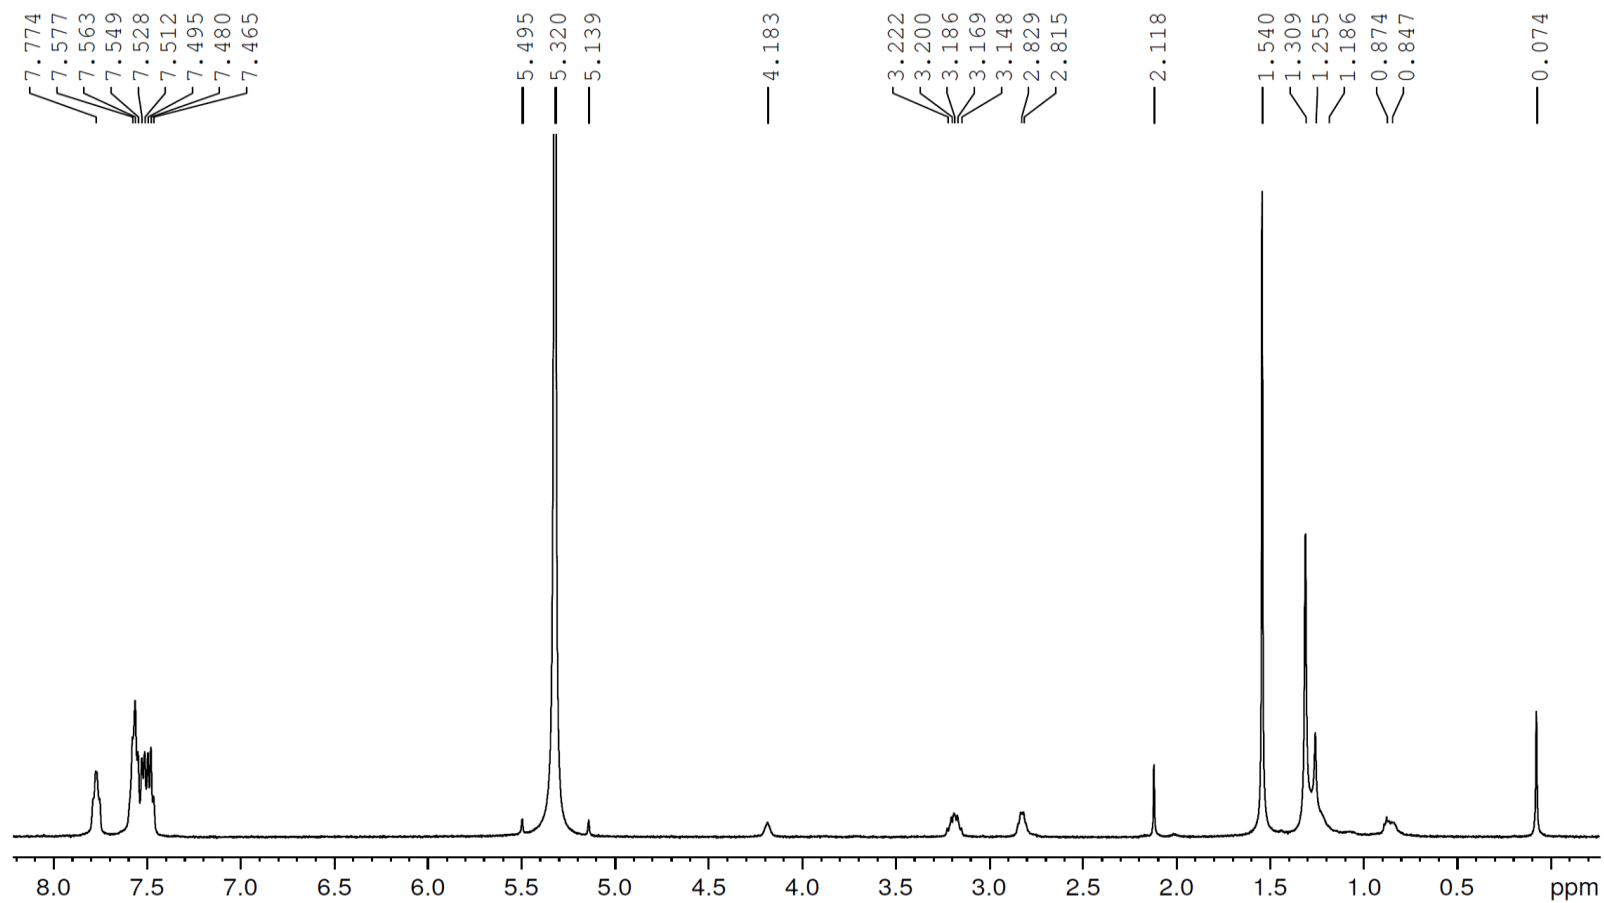

#### 4.2 P-31 NMR *fac*-[<sup>99</sup>Tc(NBoc-PNP)(CO)<sub>3</sub>Cl] (1D)

No signal was observed due to the non-symmetry within the complex and the significant quadropolar moment of the Tc-99 nucleus.

### 4.3 Tc-99 NMR *fac*-[<sup>99</sup>Tc(NBoc-PNP)(CO)<sub>3</sub>Cl] (1D)

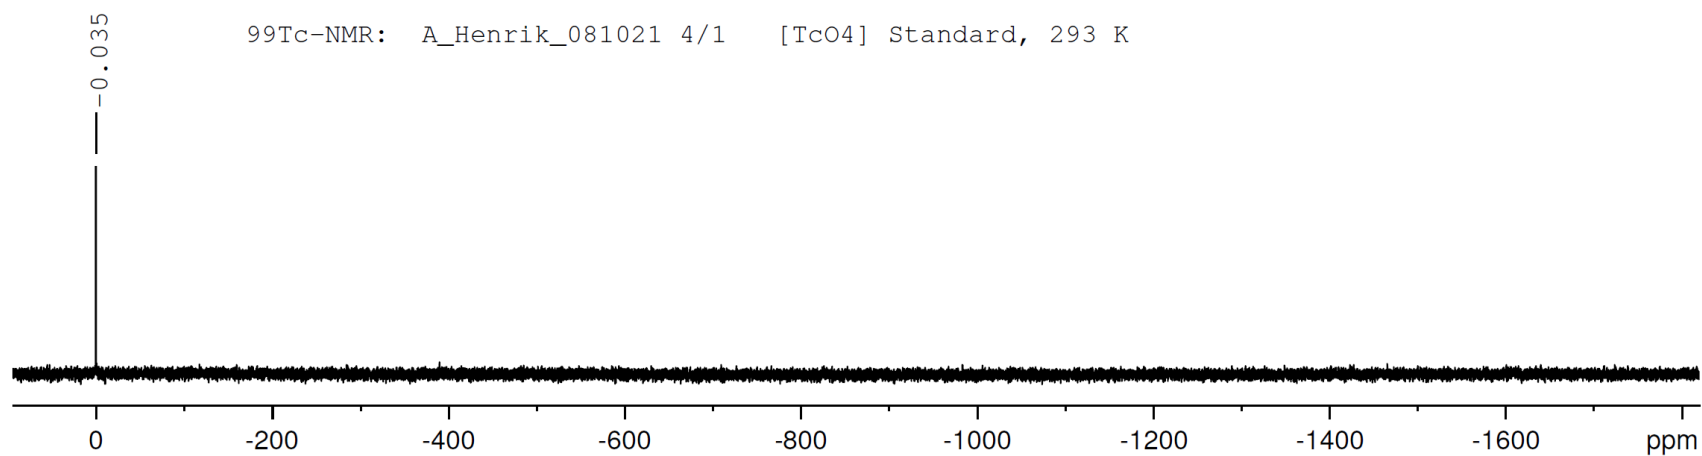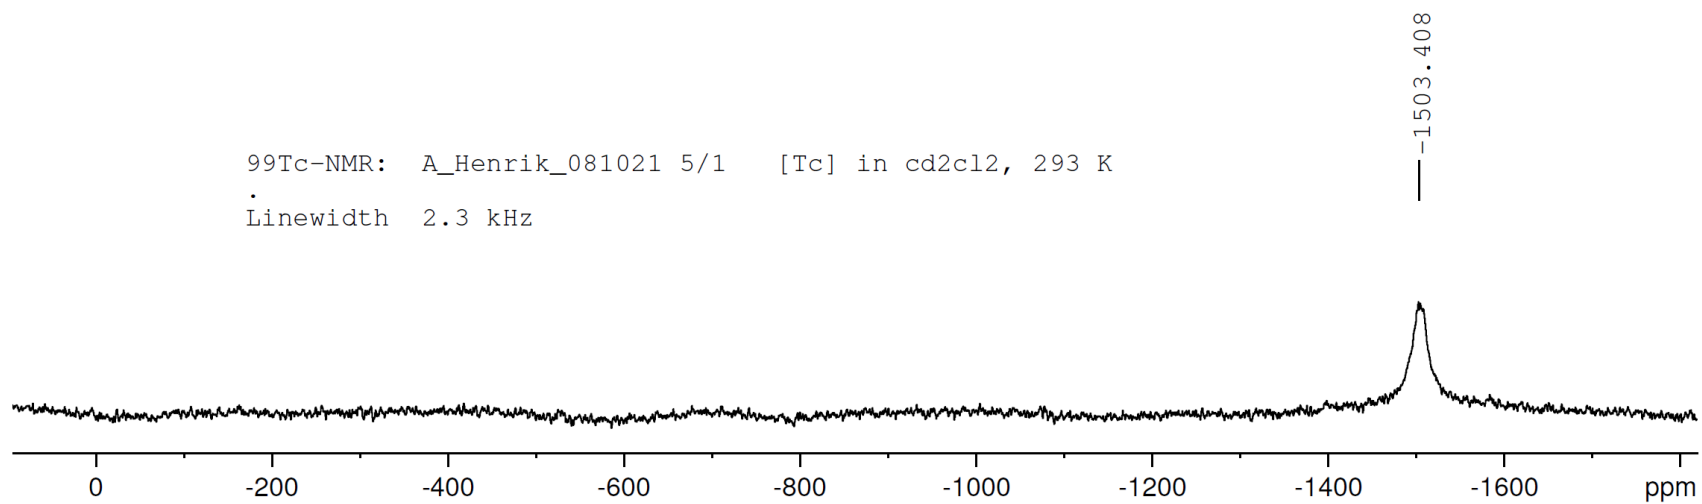

#### 4.4 IR spectrum for *fac*-[<sup>99</sup>Tc(NBoc-PNP)(CO)<sub>3</sub>Cl] (1D)

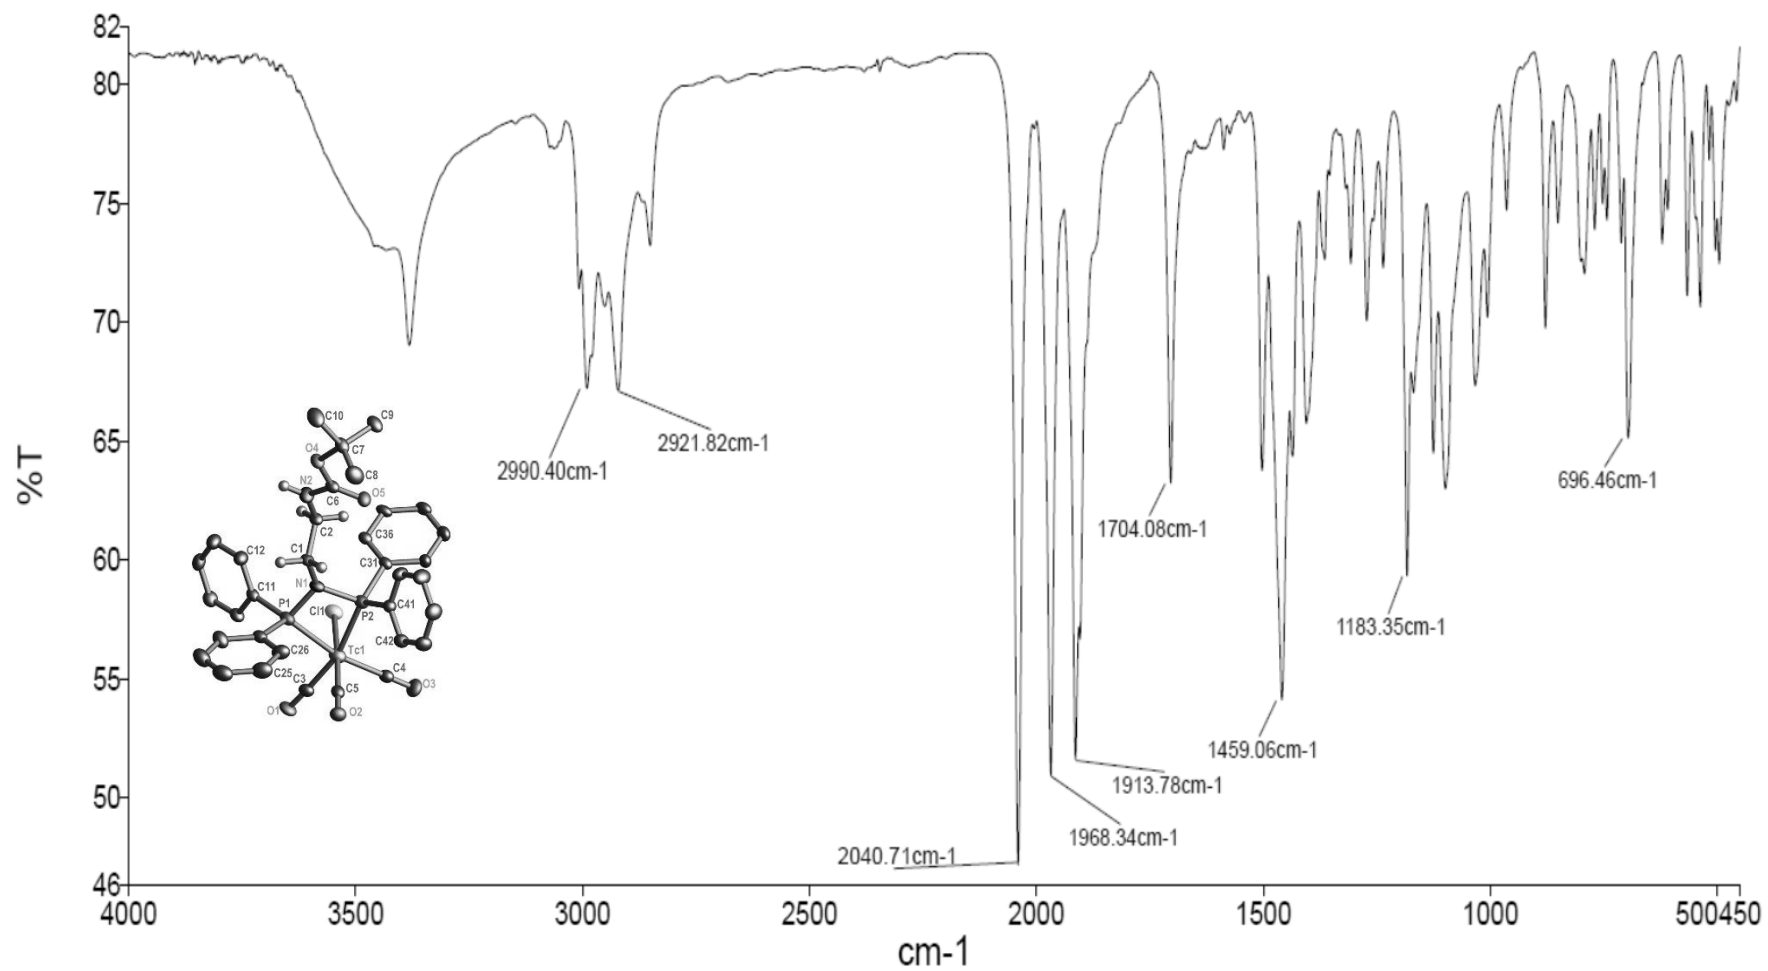



## 5. Preliminary substitution kinetic evaluation

All  $^{31}\text{P}$  NMR spectra were analyzed on 400 MHz AVANCE III nuclear magnetic resonance spectrometer operation at a temperature of 25 °C using deuterated acetonitrile as a solvent. Chemical shifts are reported in parts per million (ppm) while the MestReNova (V 6.02-5475) program was used for graphical illustrations.

### 5.1. 1,3,5-triaza-7-phosphaadamantane (PTA) as the entering ligand

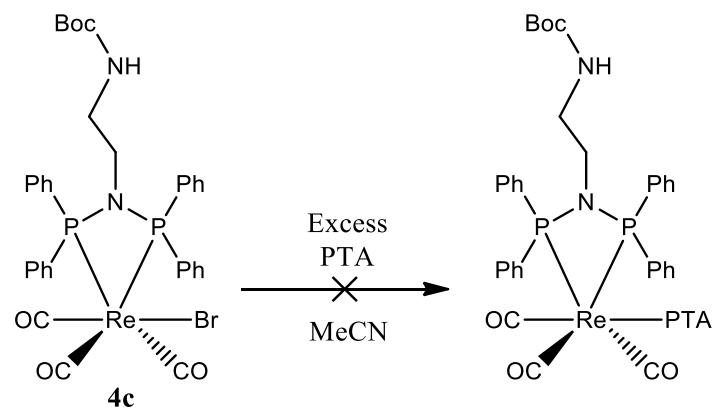

**Figure S 1** Reaction scheme of attempted Bromido substitution on **1A** with PTA.

The potential substitution of the bromido ligand from **1A** ( $7.5 \times 10^{-3}$  M) with PTA (0.075 M) was investigated in deuterated MeCN for 4 hours at 25 °C using  $^{31}\text{P}$  NMR on a 400 MHz AVANCE III NMR spectrometer under *pseudo* first-order conditions. From the  $^{31}\text{P}$  NMR results illustrated **Fig. S2**, two distinct single peaks were observed. However, these peaks correspond only to **1A** (46.15 ppm) and the entering ligand **PTA** (-102.10 ppm).

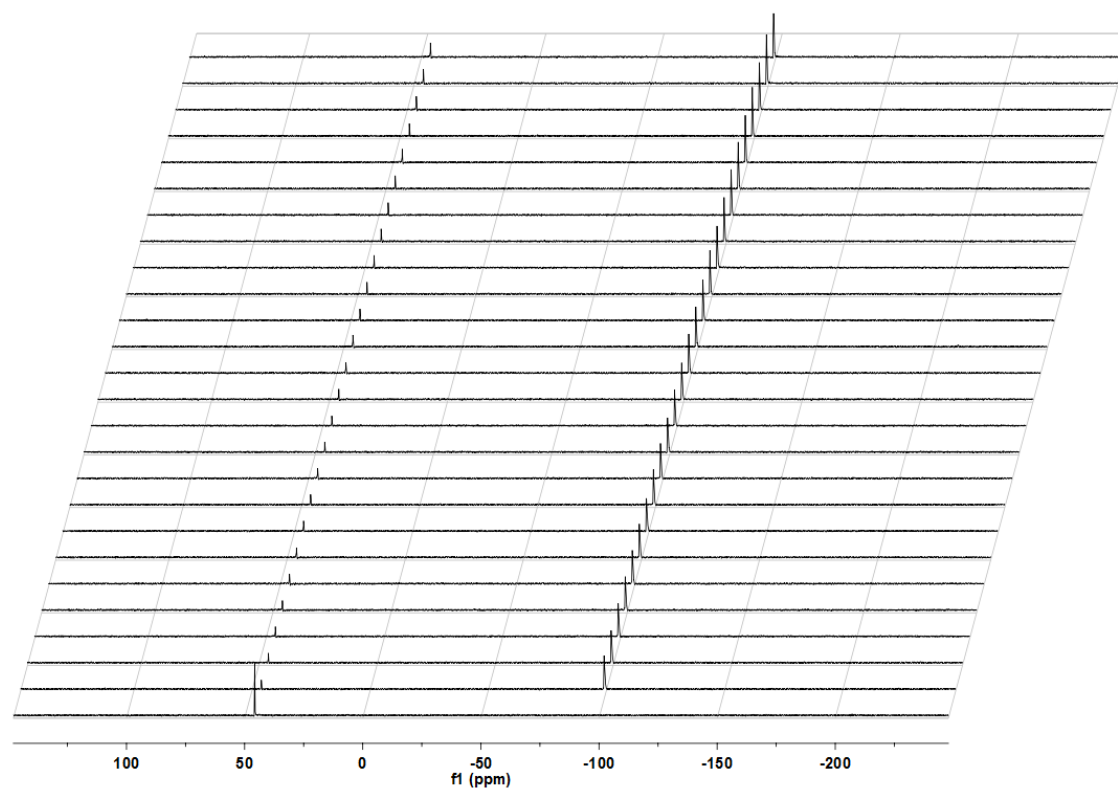

**Figure S 2** Stacked plot of  $^{31}\text{P}$  NMR spectra as a function of time ( $\Delta t = 140$  s) for the reaction between 1A and PTA. The first spectrum denotes the undiluted starting concentration of 1A while the remaining spectra illustrate only the last hour of the 4 hour reaction.

The same substitution reaction was performed at various concentrations on a Varian 50 Conc UV/Vis spectrophotometer. As anticipated, no absorbance change was observed. Both the UV/Vis and the  $^{31}\text{P}$  NMR studies were performed in triplicate for reproducibility purposes

## 5.2. Pyridine as the entering ligand

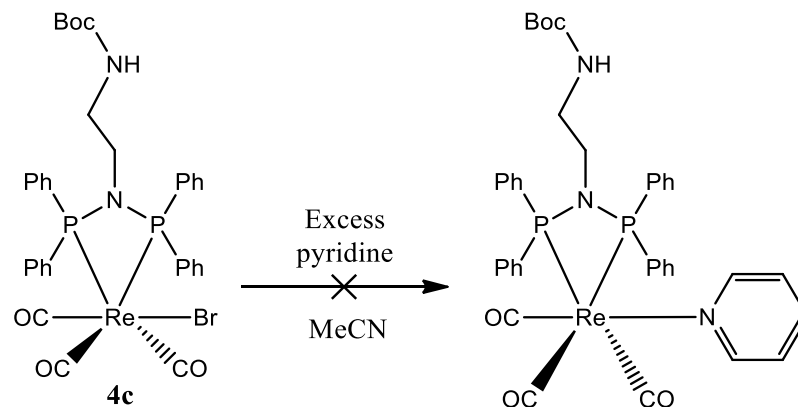

**Figure S 3** Reaction scheme of attempted Bromido substitution on **1A** with Pyridine.

Similar to the PTA substitution reaction, the substitution reaction of the bromide moiety in **1A** (0.015 M) by pyridine (0.045 M) in deuterated MeCN was investigated for 4 hours at 25 °C using  $^{31}\text{P}$  NMR technique on a 400 MHz AVANCE III NMR spectrometer under *pseudo* first-order conditions. Similar to the PTA substitution reaction, again a distinct single peak at 46.15 ppm corresponding to only **1A** indicating that no substitution of the  $\text{Br}^-$  ligand took place (**Fig. S4**). The same substitution reaction was performed at various concentrations on a Varian 50 Conc UV/Vis spectrophotometer. As anticipated, no absorbance change was observed. Both the UV/Vis and the  $^{31}\text{P}$  NMR studies were performed in triplicate for reproducibility purposes.

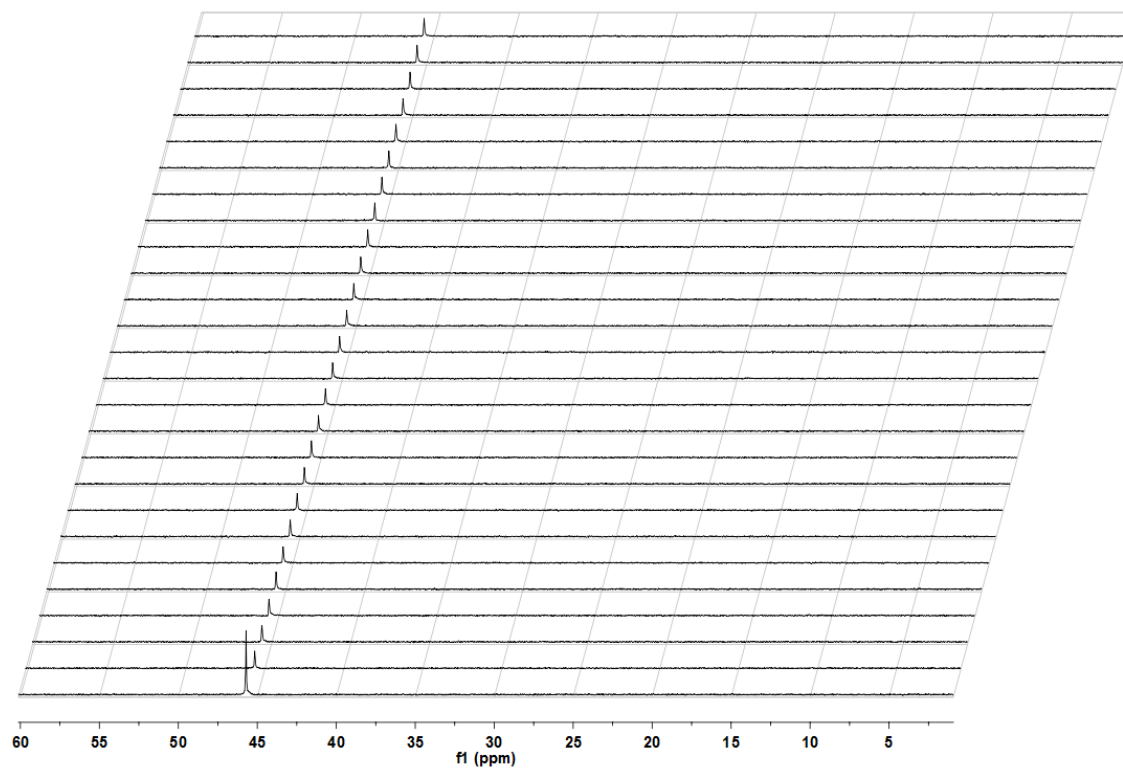

**Figure S 4** Stacked plot of  $^{31}\text{P}$  NMR spectra as a function of time ( $\Delta t = 140$  s) for monitoring the kinetics for the reaction between 1A and pyridine. The first spectrum denotes the undiluted starting concentration of 1A while the remaining spectra illustrates only the last hour of the 4 hour reaction.

### 5.3. Thiocyanate anion (using NaSCN) as the entering ligand

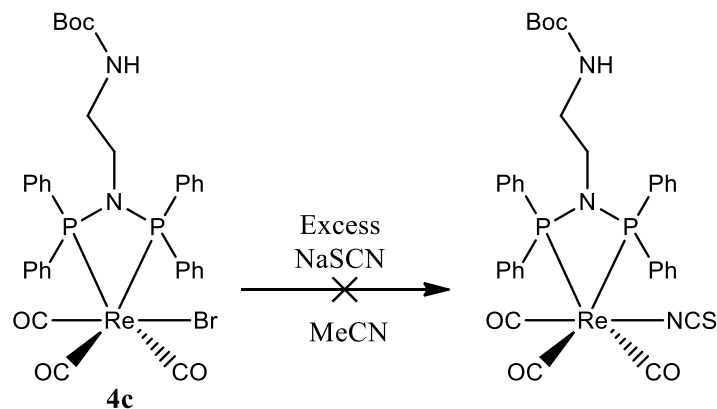

**Figure S 5** Reaction scheme of attempted Bromido substitution on **1A** with NaSCN.

Similar to the PTA substitution reaction, the substitution reaction of the bromide moiety in **1A** ( $5 \times 10^{-3}$  M) with sodium NaSCN (0.075 M) in deuterated MeCN was investigated for 4 hours at 25 °C using  $^{31}\text{P}$  NMR on a 400 MHz AVANCE III NMR spectrometer under *pseudo* first-order conditions. Again, only a distinct single peak at 45.69 ppm corresponding to **1A** was observed as illustrated below indicating that no substitution reaction took place (**Fig. S6**).

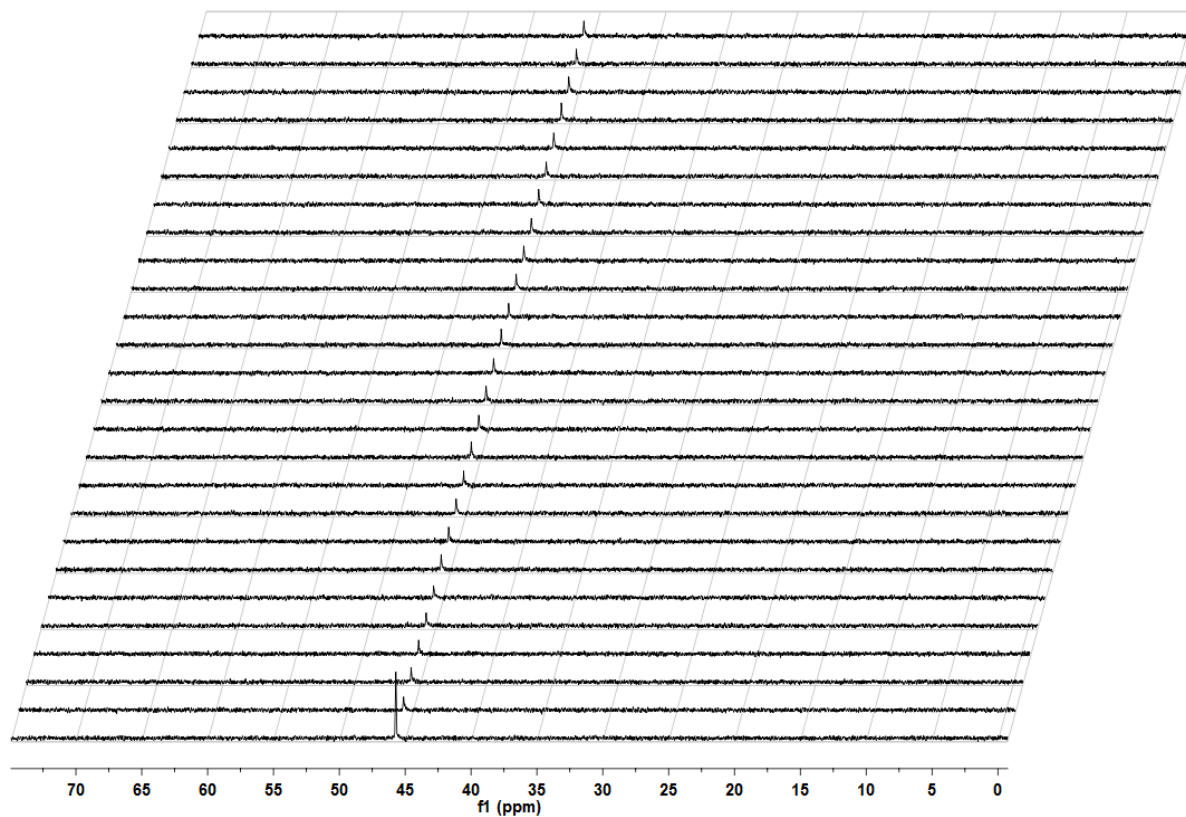

**Figure S 6** Stacked plot of  $^{31}\text{P}$  NMR spectra as a function of time ( $\Delta t = 140$  s) for monitoring the kinetics for the reaction between 1A and NaSCN. The first spectrum denotes the undiluted starting concentration of 1A while the remaining spectra illustrate only the last hour of the 4 hour reaction.

The same substitution reaction was performed at various concentrations on a Varian 50 Conc UV/Vis spectrophotometer. As anticipated, no absorbance change was observed. Both the UV/Vis and the  $^{31}\text{P}$  NMR studies were performed in triplicate for reproducibility purposes
